# Supplementary material for: Design of a Tribotester Based on Non-Contact Displacement Measurements
Source: MDPI journal article supplement (doi:10.3390/mi10110748), 2019-10-31
Supplement: s1 [file s1]

## Supporting information

# Design of a Tribotester based on Non-Contact Displacement Measurements

Chang-Lae Kim and Yoon-Gyung Sung\*

Department of Mechanical Engineering, Chosun University, Gwangju 61452, Korea; kimcl@chosun.ac.kr

\* Correspondence: sungyg@chosun.ac.kr; Tel.: +82-62-230-7181

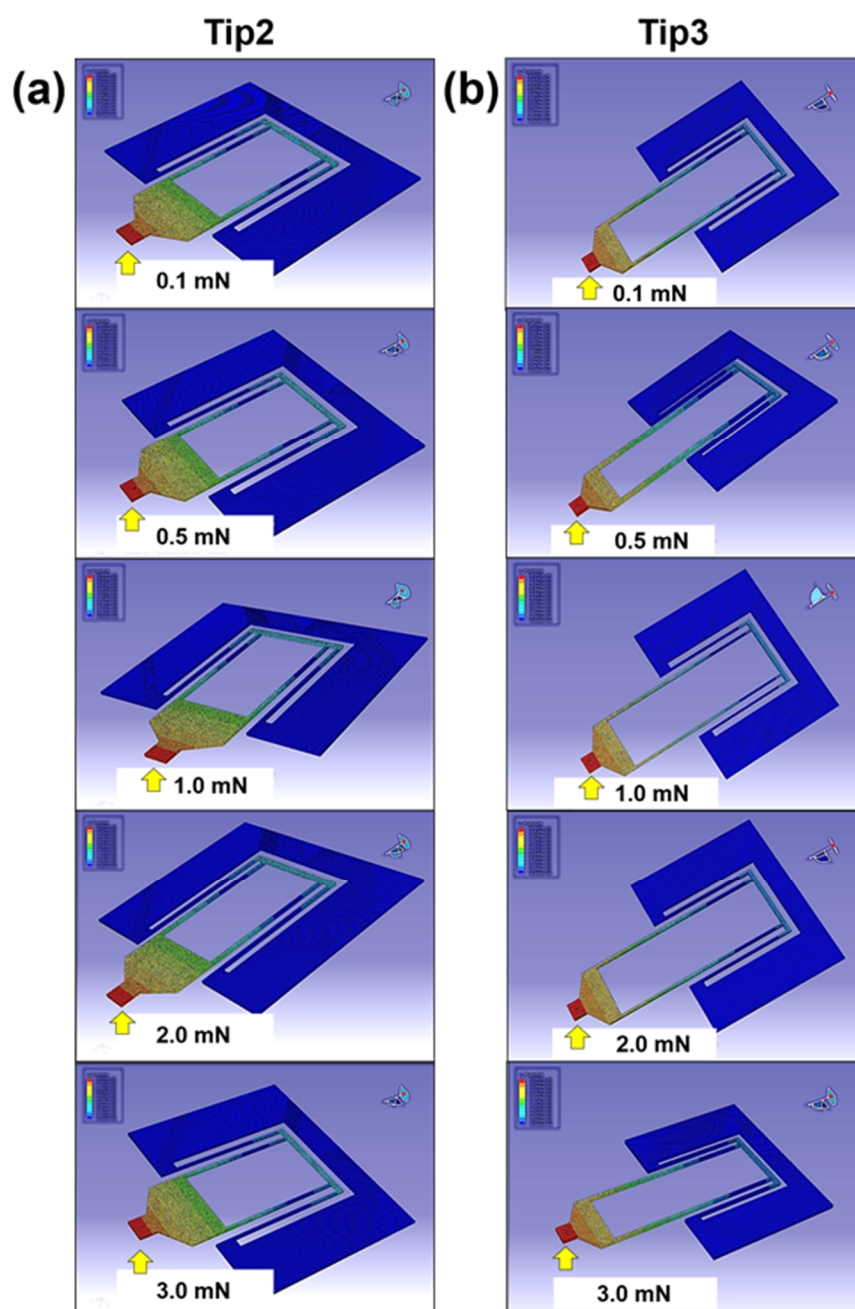

**Figure S1.** Displacement results for (a) Tip 2 and (b) Tip 3 depending on the normal forces (0.1, 0.5, 1.0, 2.0, and 3.0 mN) based on FEA simulations.

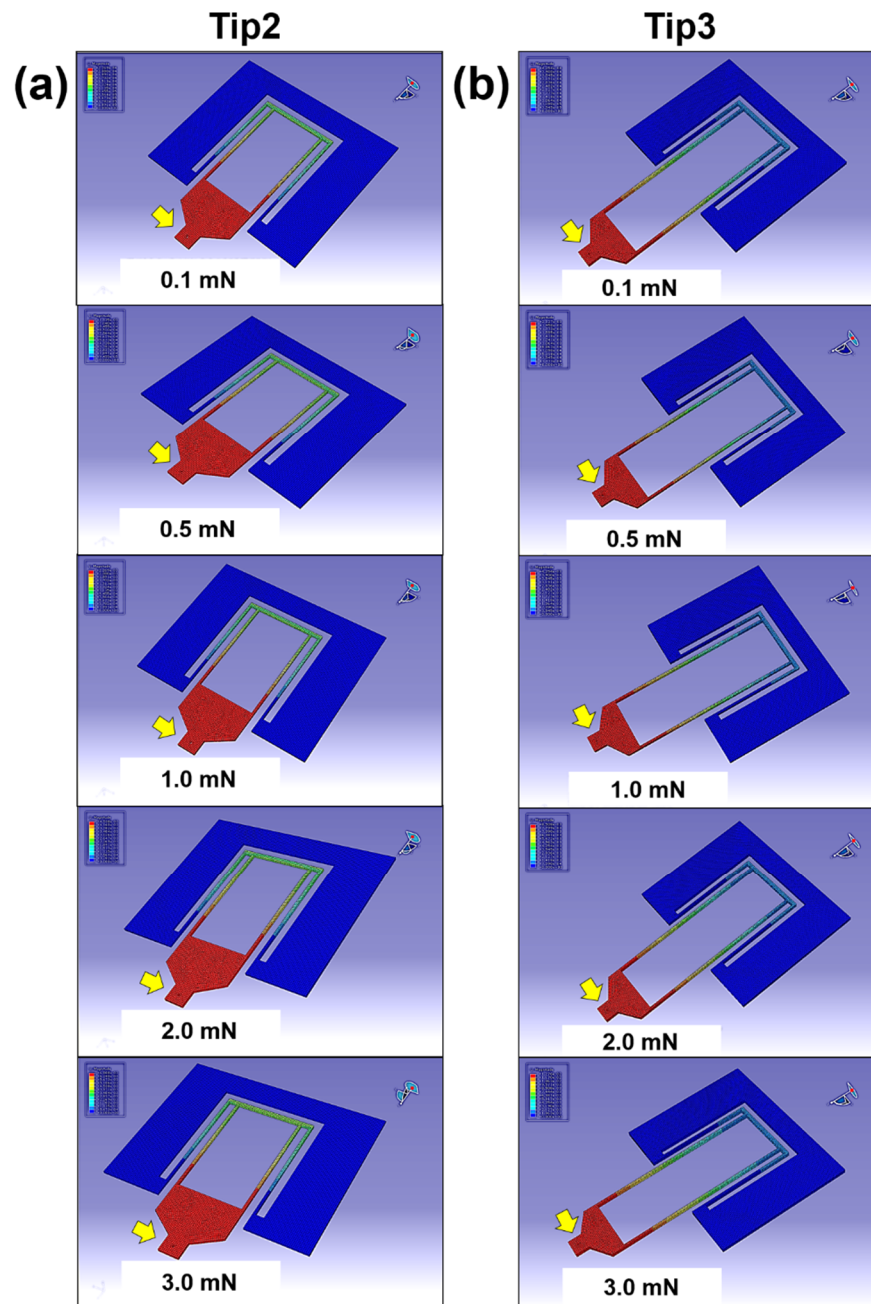

**Figure S2.** Displacement results for (a) Tip 2 and (b) Tip 3 depending on the friction forces (0.1, 0.5, 1.0, 2.0, and 3.0 mN) based on FEA simulations.

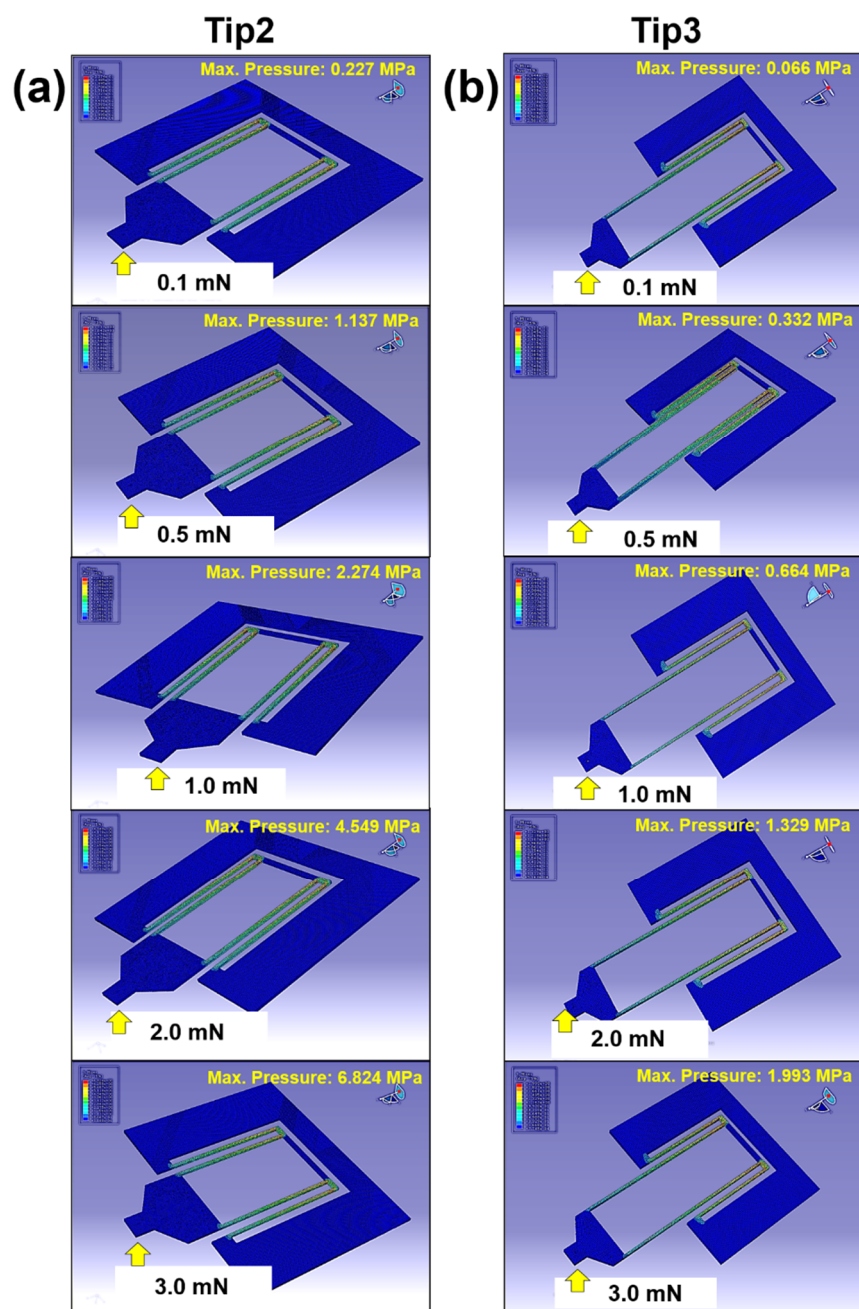

**Figure S3.** Pressure results for (a) Tip 2 and (b) Tip 3 depending on the normal forces (0.1, 0.5, 1.0, 2.0, and 3.0 mN) based on FEA simulations.

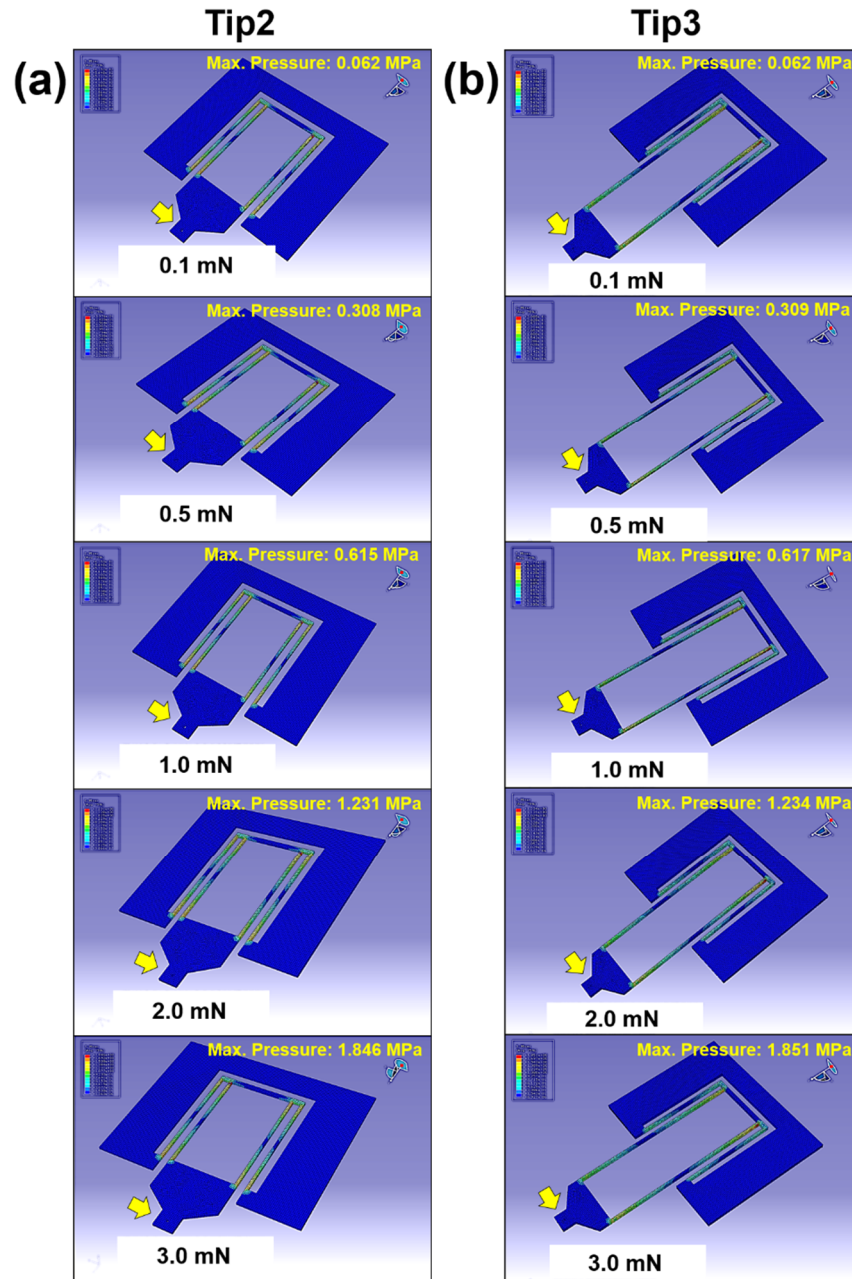

**Figure S4.** Pressure results for (a) Tip 2 and (b) Tip 3 depending on the friction forces (0.1, 0.5, 1.0, 2.0, and 3.0 mN) based on FEA simulations.

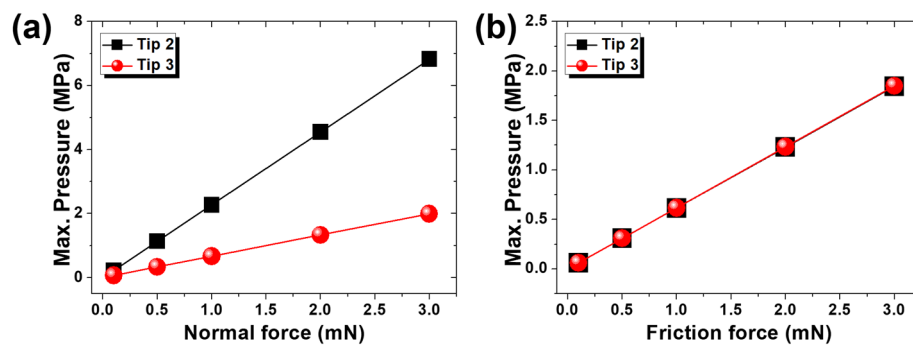

**Figure S5.** Pressure variations of Tip 2 and Tip 3 depending on the (a) normal forces and (b) friction forces, respectively (0.1, 0.5, 1.0, 2.0, and 3.0 mN).



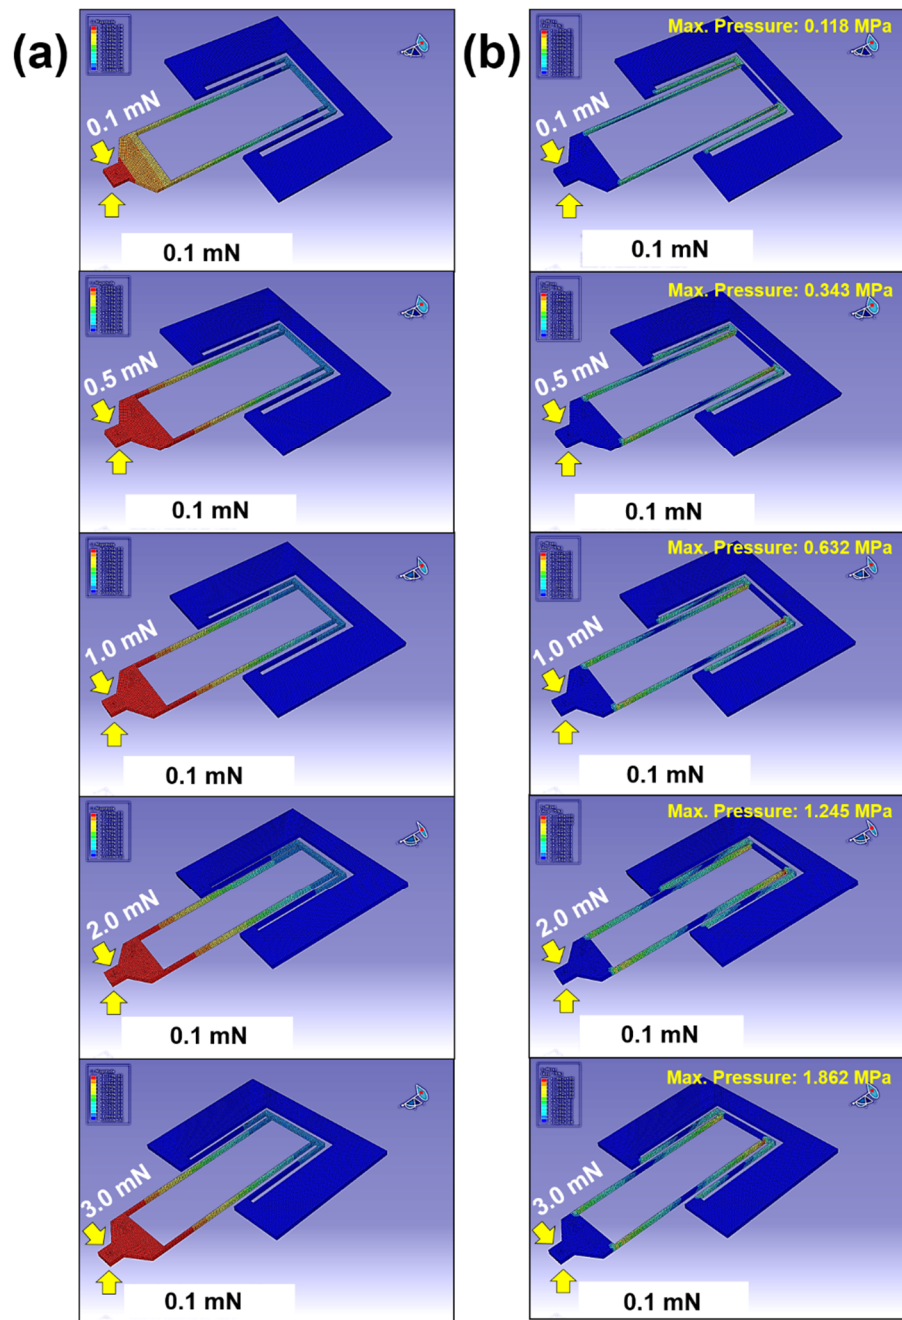

**Figure S6.** (a) Displacement and (b) pressure changes of Tip 3 depending on the friction force under a normal force of 0.1 mN.

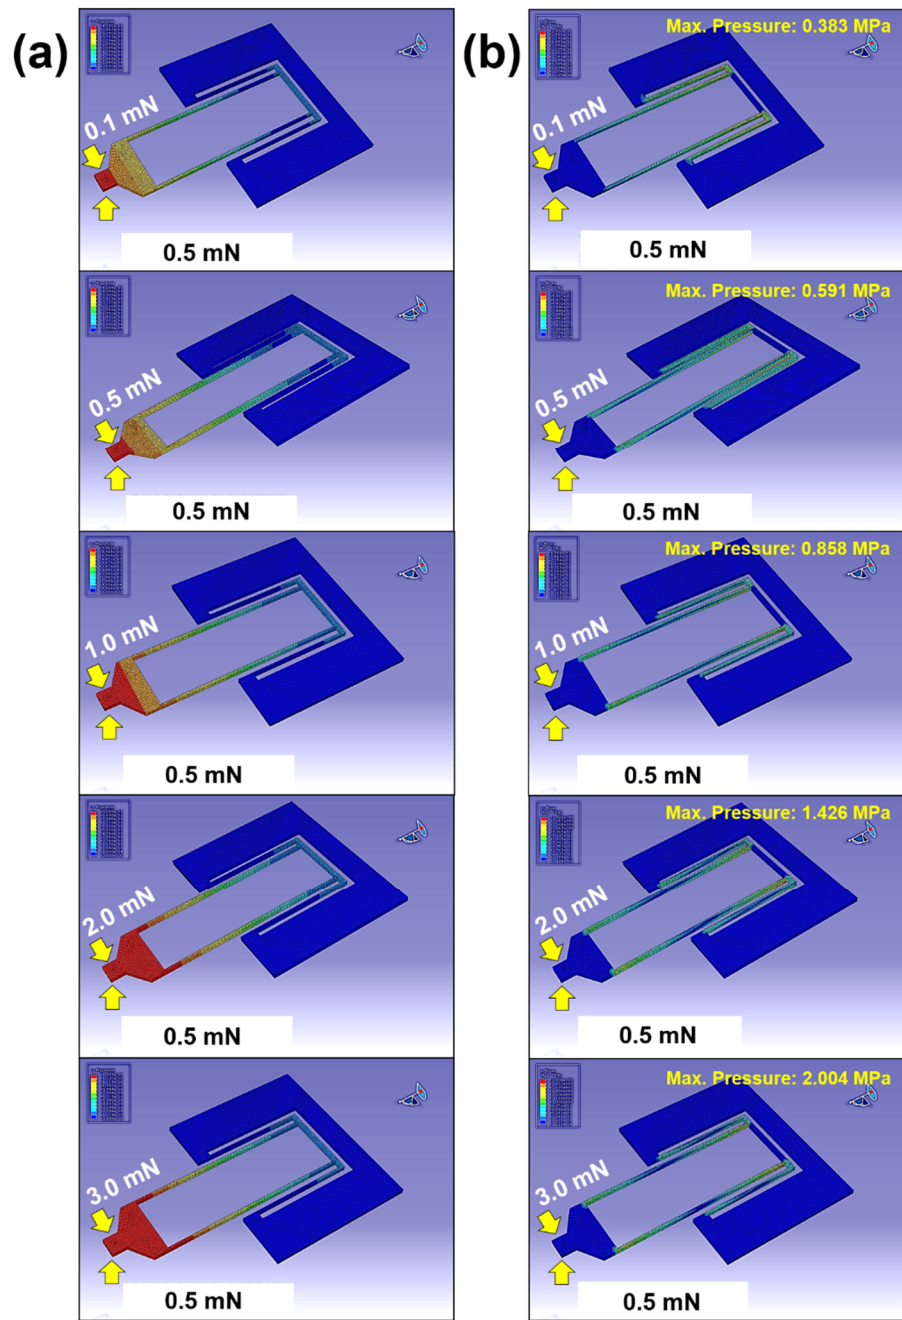

**Figure S7.** (a) Displacement and (b) pressure changes of Tip 3 depending on the friction force under a normal force of 0.5 mN.

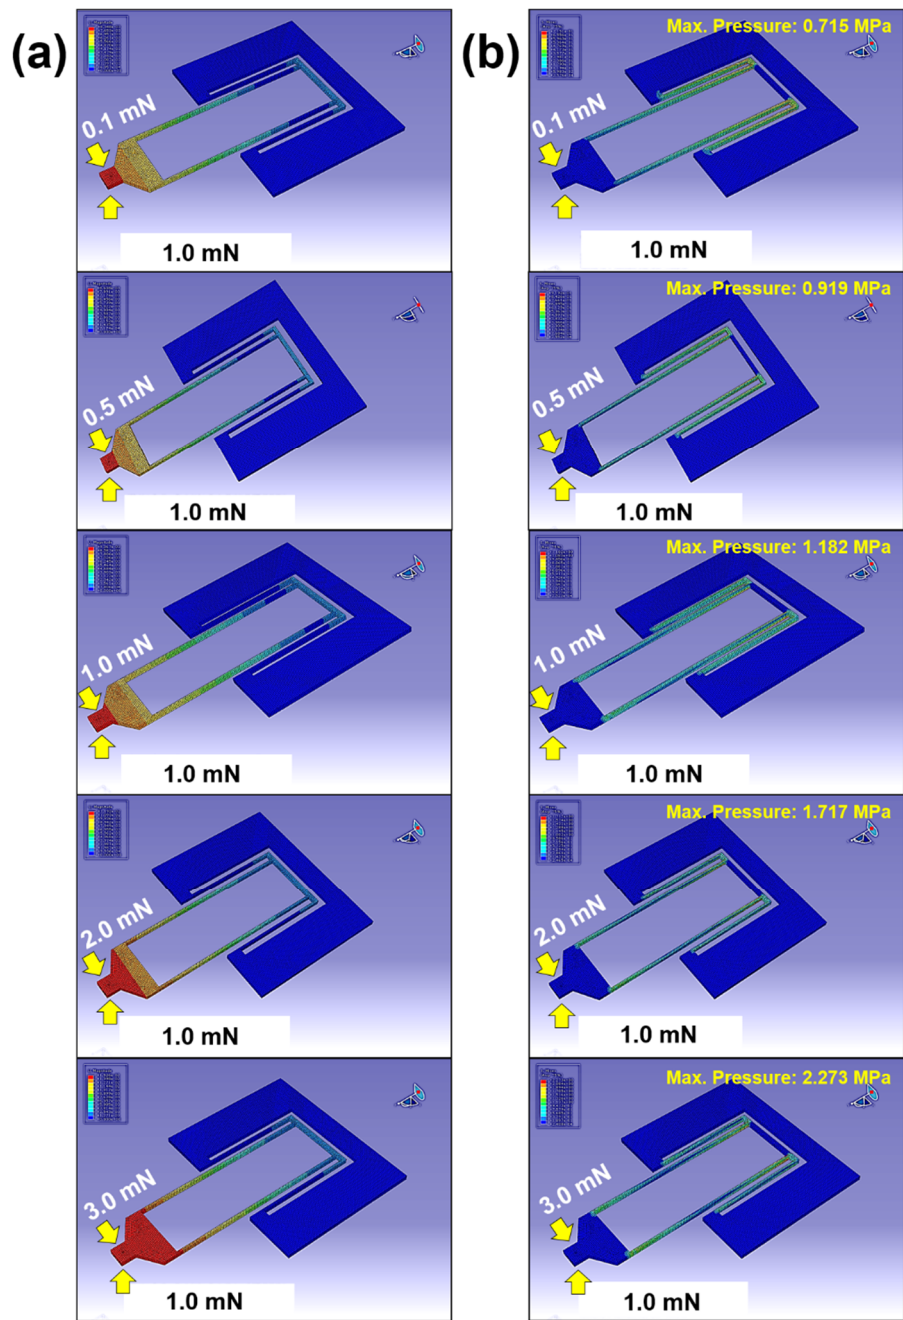

**Figure S8.** (a) Displacement and (b) pressure changes of Tip 3 depending on the friction force under a normal force of 1.0 mN.

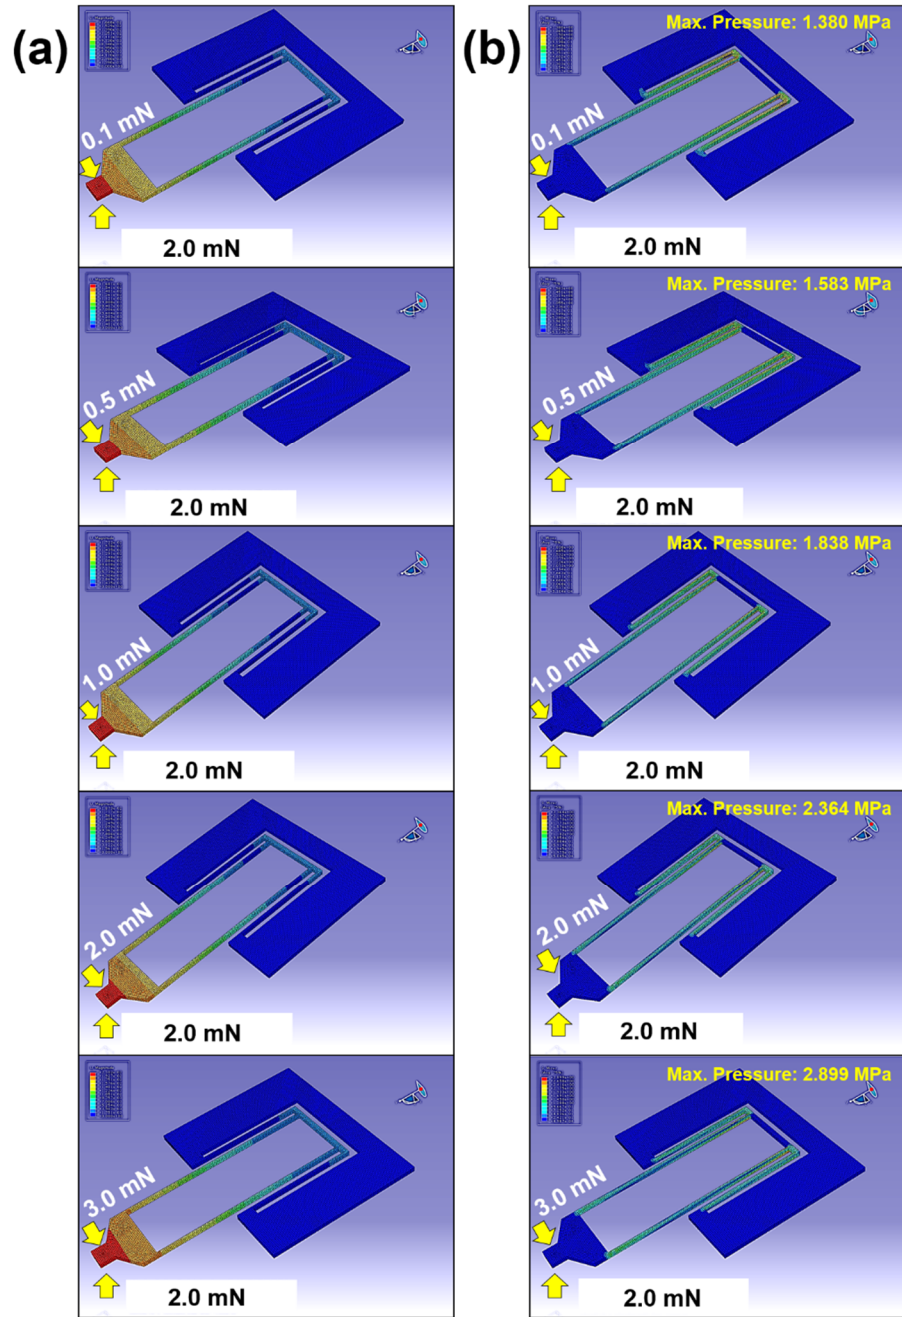

**Figure S9.** (a) Displacement and (b) pressure changes of Tip 3 depending on the friction force under a normal force of 2.0 mN.

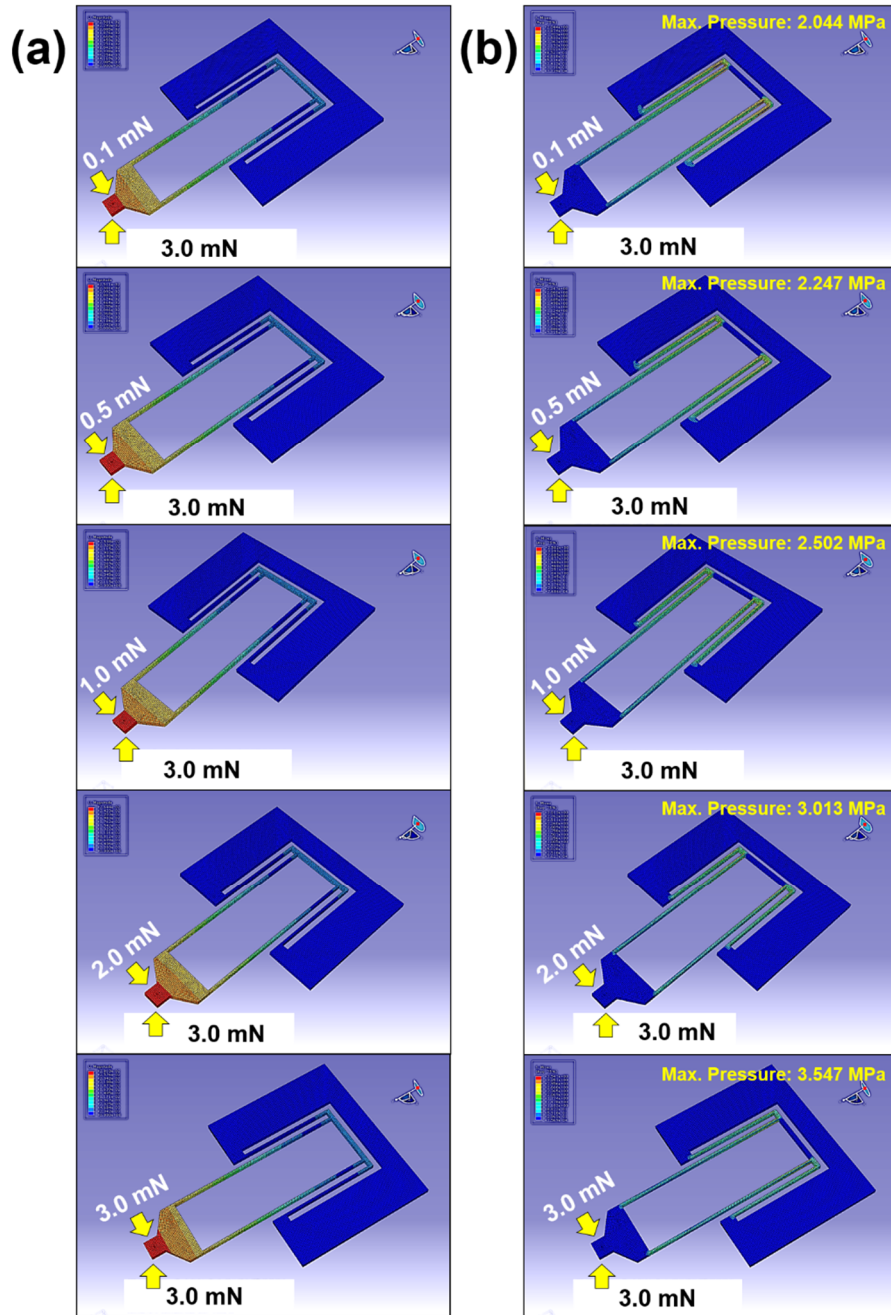

**Figure S10.** (a) Displacement and (b) pressure changes of Tip 3 depending on the friction force under a normal force of 3.0 mN.



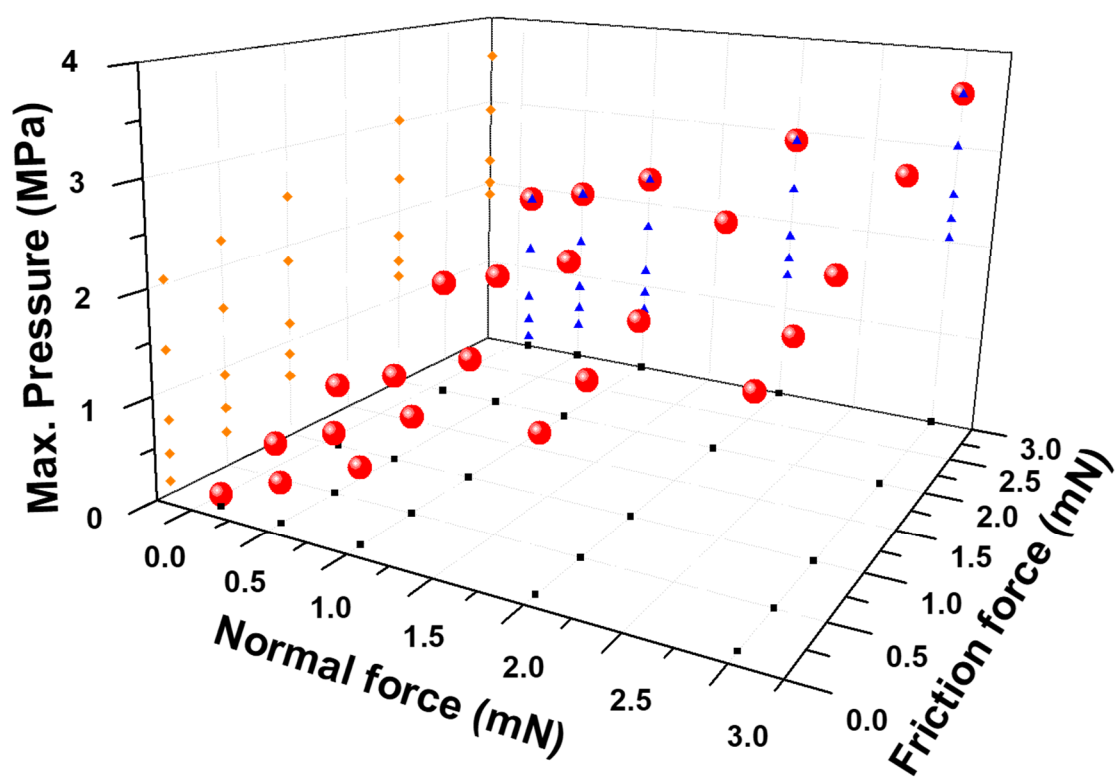

**Figure S11.** Relationship between the maximum pressure and normal/friction forces generated at the edge parts of the arms of the cantilever tip.
