# Supplementary material for: Design of a Tribotester Based on Non-Contact Displacement Measurements
Source: Micromachines (Basel). 2019 Oct 31;10(11):748. doi: 10.3390/mi10110748 (PMC6915551; doi:10.3390/mi10110748)
Supplement: Supplementary file 1 [file micromachines-10-00748-s001.zip]

Archive with 12 entries (12 files):
- Figure S1.tiff
- Figure S10.tiff
- Figure S11.tiff
- Figure S2.tiff
- Figure S3.tiff
- Figure S4.tiff
- Figure S5.tiff
- Figure S6.tiff
- Figure S7.tiff
- Figure S8.tiff
- Figure S9.tiff
- Supplementary Materials-layout.pdf
